# Supplementary material for: Polysiloxane/Polystyrene Thermo-Responsive and Self-Healing Polymer Network via Lewis Acid-Lewis Base Pair Formation
Source: PubMed Central journal article supplement (PMC6017355; doi:10.3390/molecules23020405), 2018-02-13
Supplement: molecules-23-00405-s001.pdf [file molecules-23-00405-s001.pdf]

# Supporting Information

## Polysiloxane/Polystyrene Thermo-Responsive and Self-Healing Polymer Network via Lewis Acid-Lewis Base Pair Formation

Fernando Vidal, Huina Lin, Cecilia Morales, and Frieder Jäkle\*

*Department of Chemistry, Rutgers University-Newark, 73 Warren Street, Newark, New  
Jersey 07102, United States*

### (A) FIGURES

---

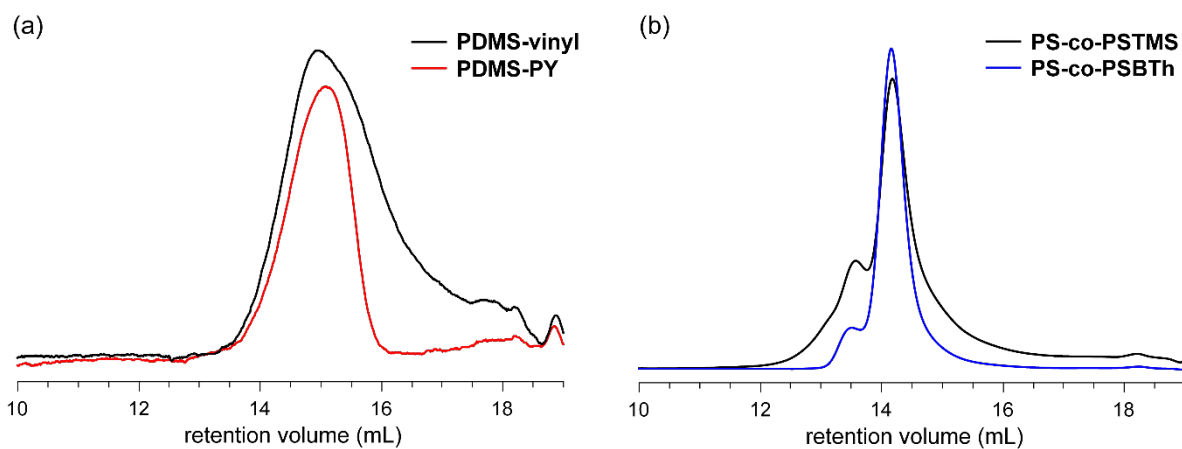

**Figure S1.** Gel permeation chromatograms of (a) PDMS polymers and (b) PS polymers.

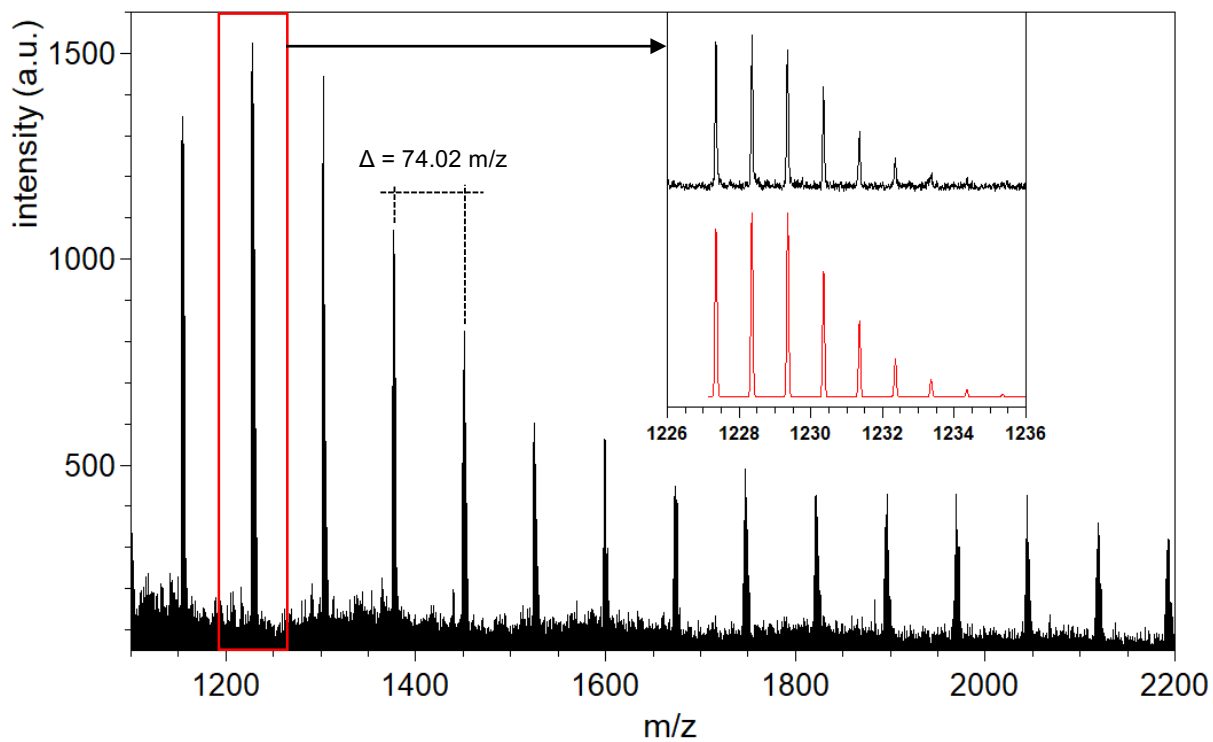

**Figure S2.** Portion of the MALDI-TOF mass spectrum of a low-molecular weight sample of **PDMS-PY**. Insert: zoom-in at the same experimental spectrum (top) and simulated spectrum for a polymer chain with a molecular formula of  $C_{42}H_{96}O_{11}Si_{12}N_2S_2Na$  (bottom).

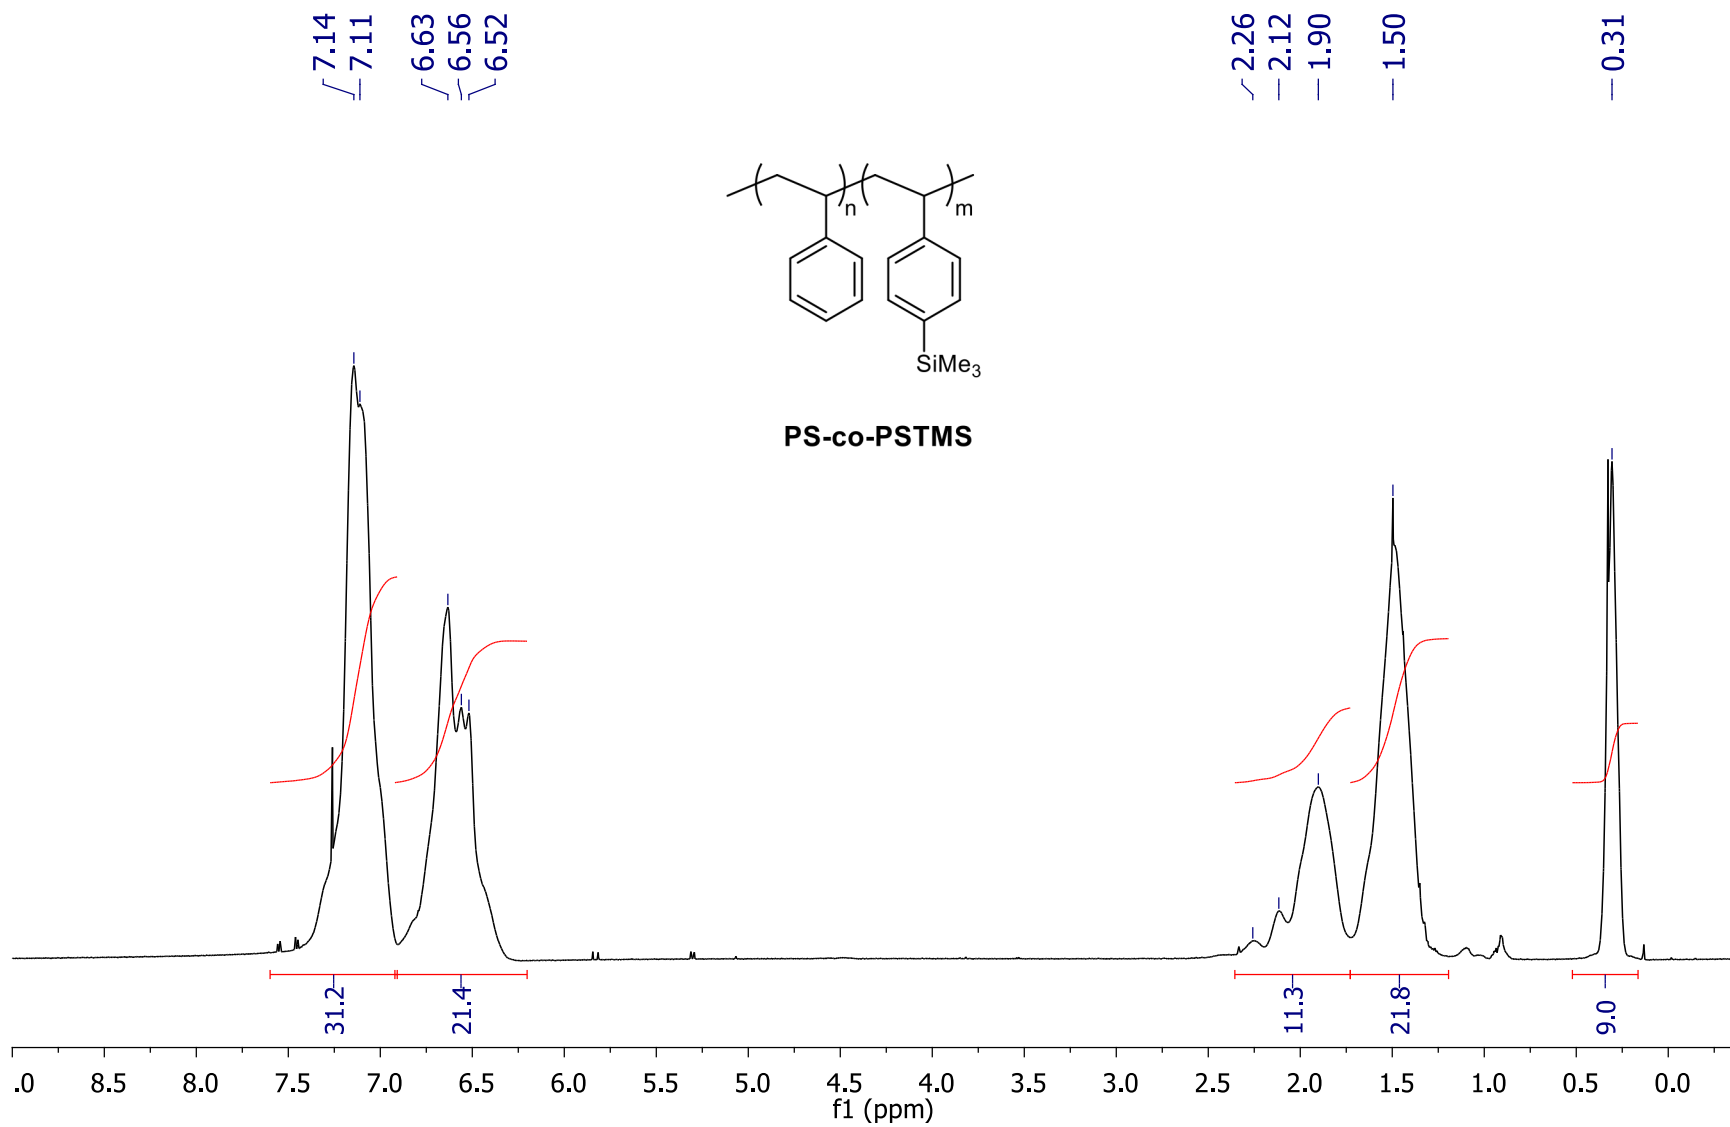

**Figure S3.** <sup>1</sup>H NMR (CDCl<sub>3</sub>, 25 °C) of isolated PS-co-PSTMS.

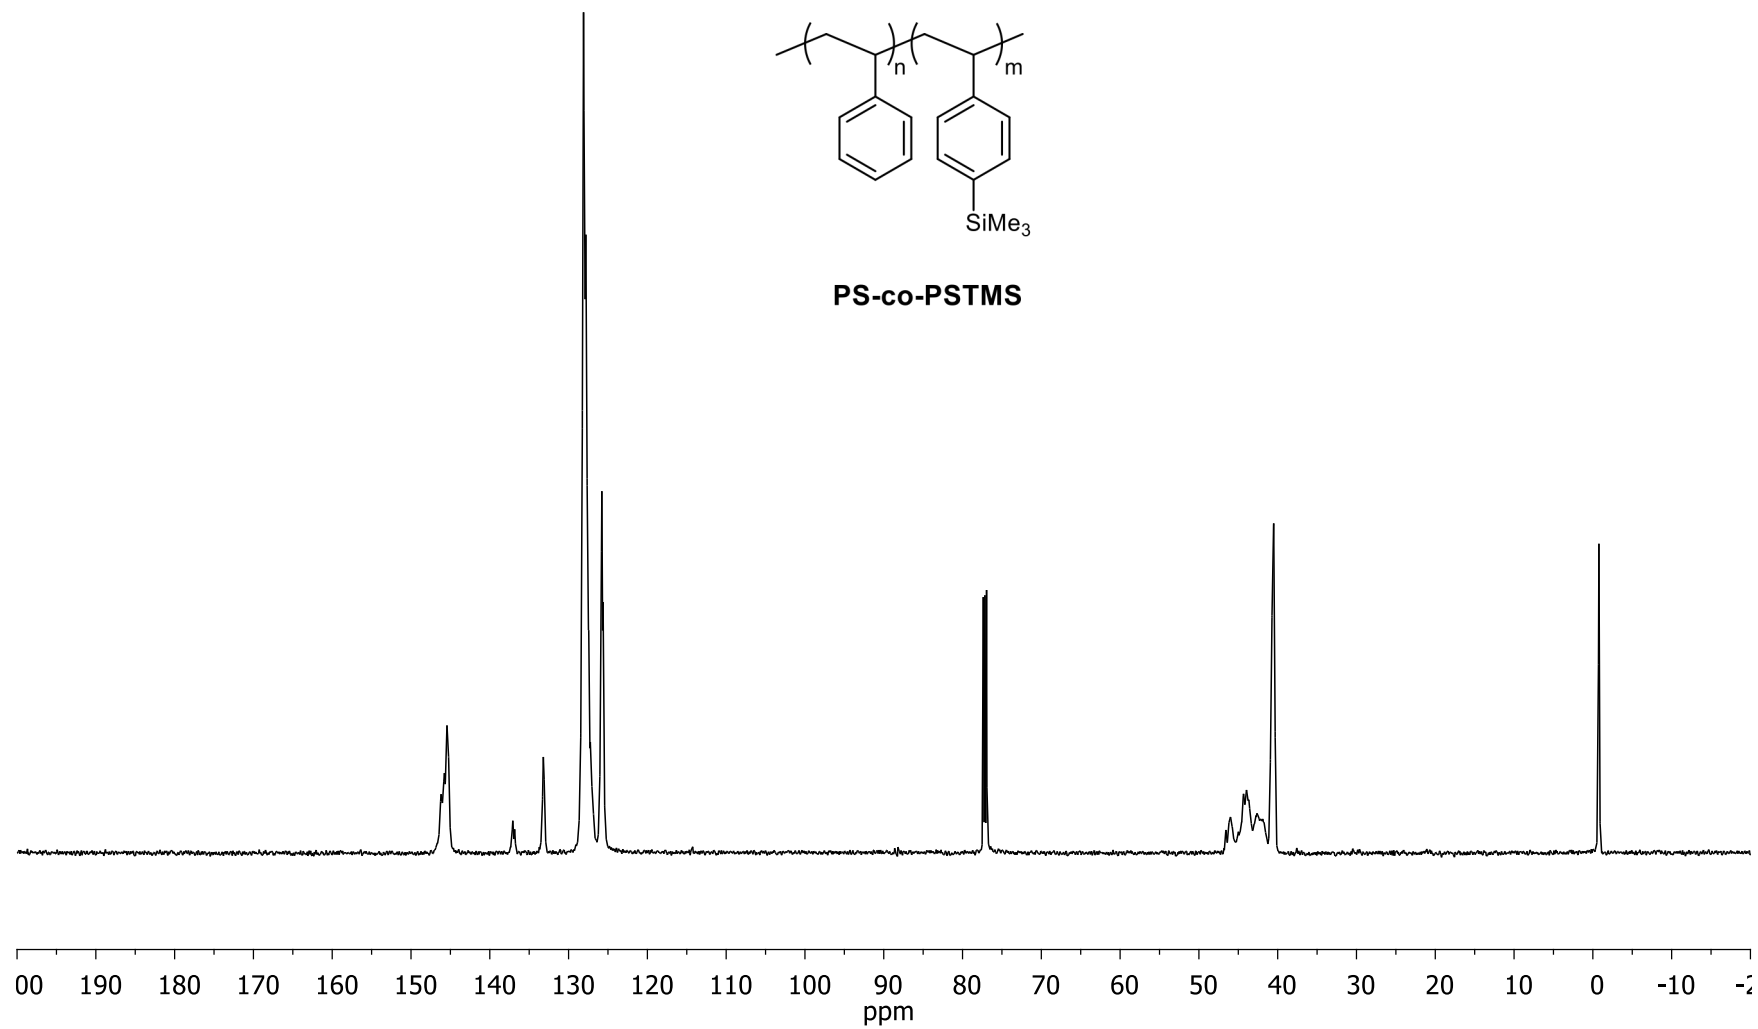

**Figure S4.**  $^{13}\text{C}$  NMR ( $\text{CDCl}_3$ , 25 °C) of isolated **PS-co-PSTMS**.

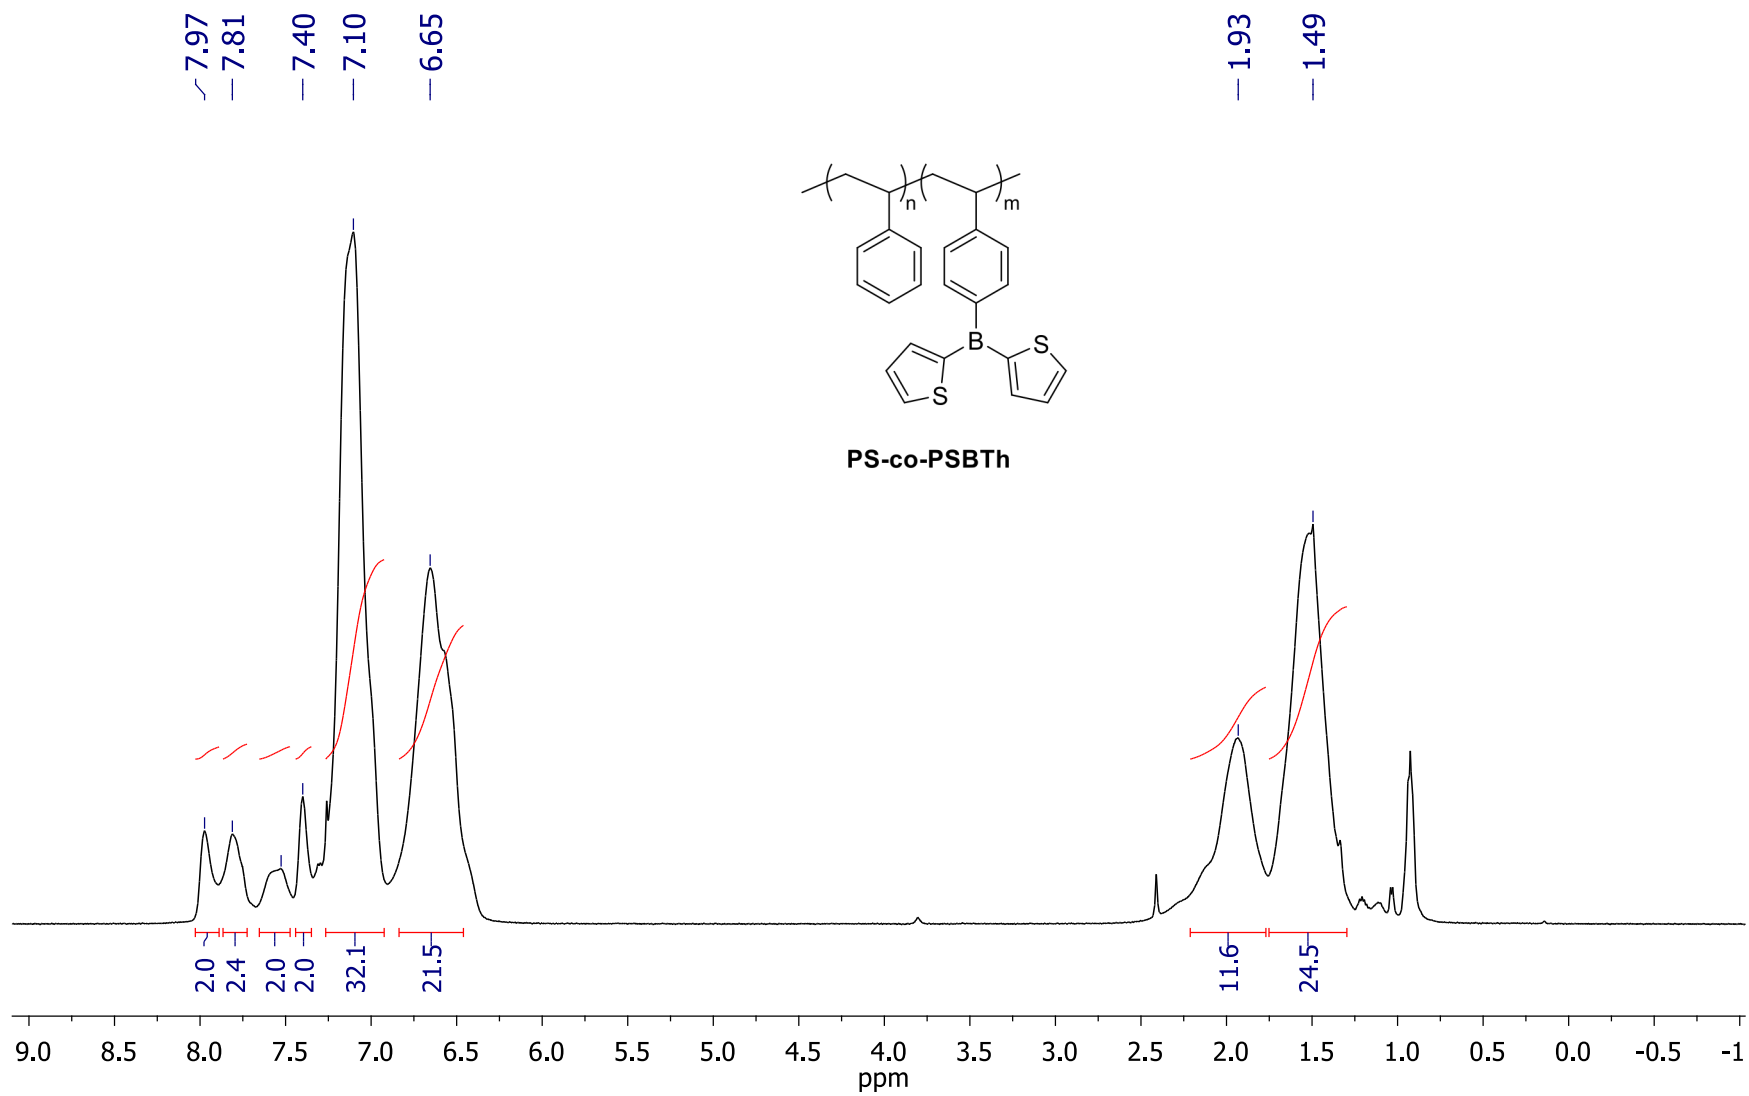

**Figure S5.** <sup>1</sup>H NMR (CDCl<sub>3</sub>, 25 °C) of isolated PS-co-PSBTh.

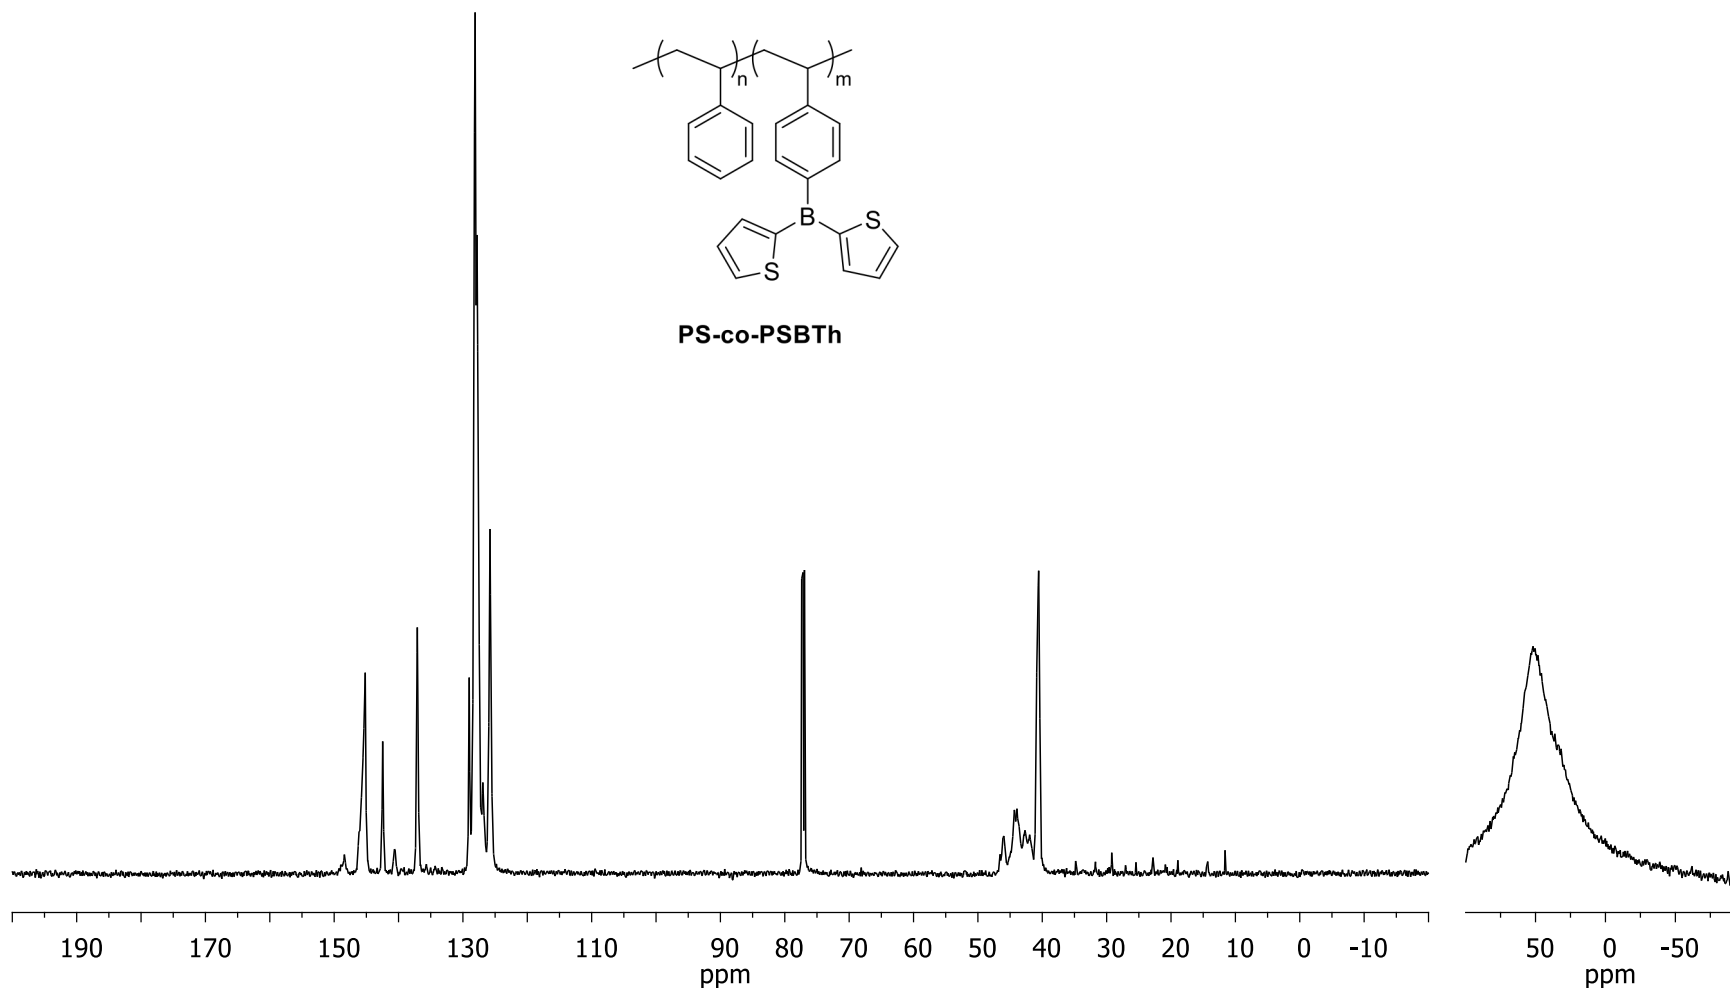

**Figure S6.**  $^{13}\text{C}$  NMR ( $\text{CDCl}_3$ ,  $25^\circ\text{C}$ , left) and  $^{11}\text{B}$  NMR ( $\text{C}_6\text{D}_6$ ,  $25^\circ\text{C}$ , right) of isolated **PS-co-PSBTh**.

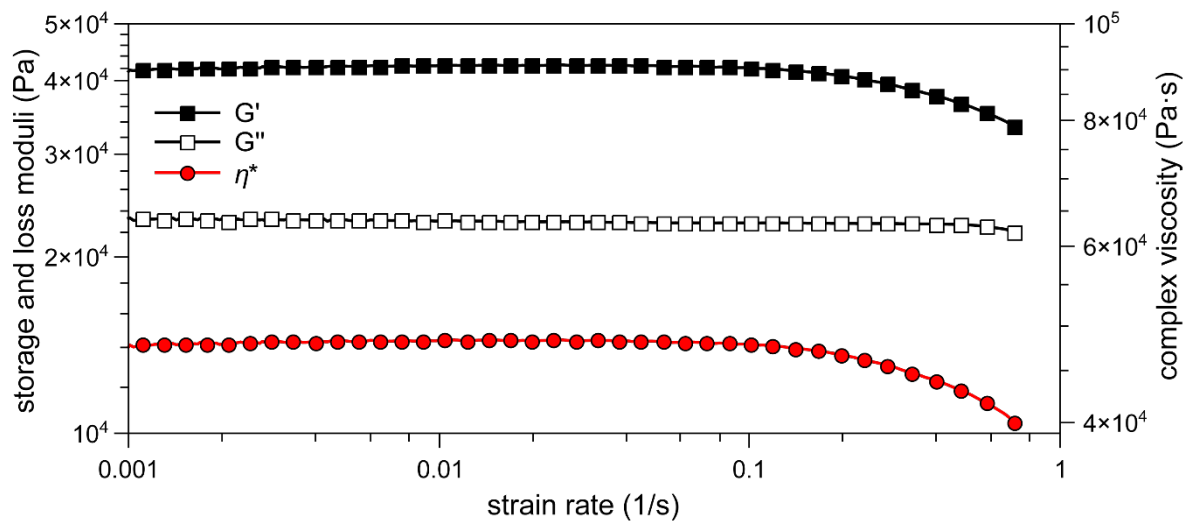

**Figure S7.** Strain-rate sweep (1 rad/s, at 25 °C) of PY-PSBTh dry gel (d).

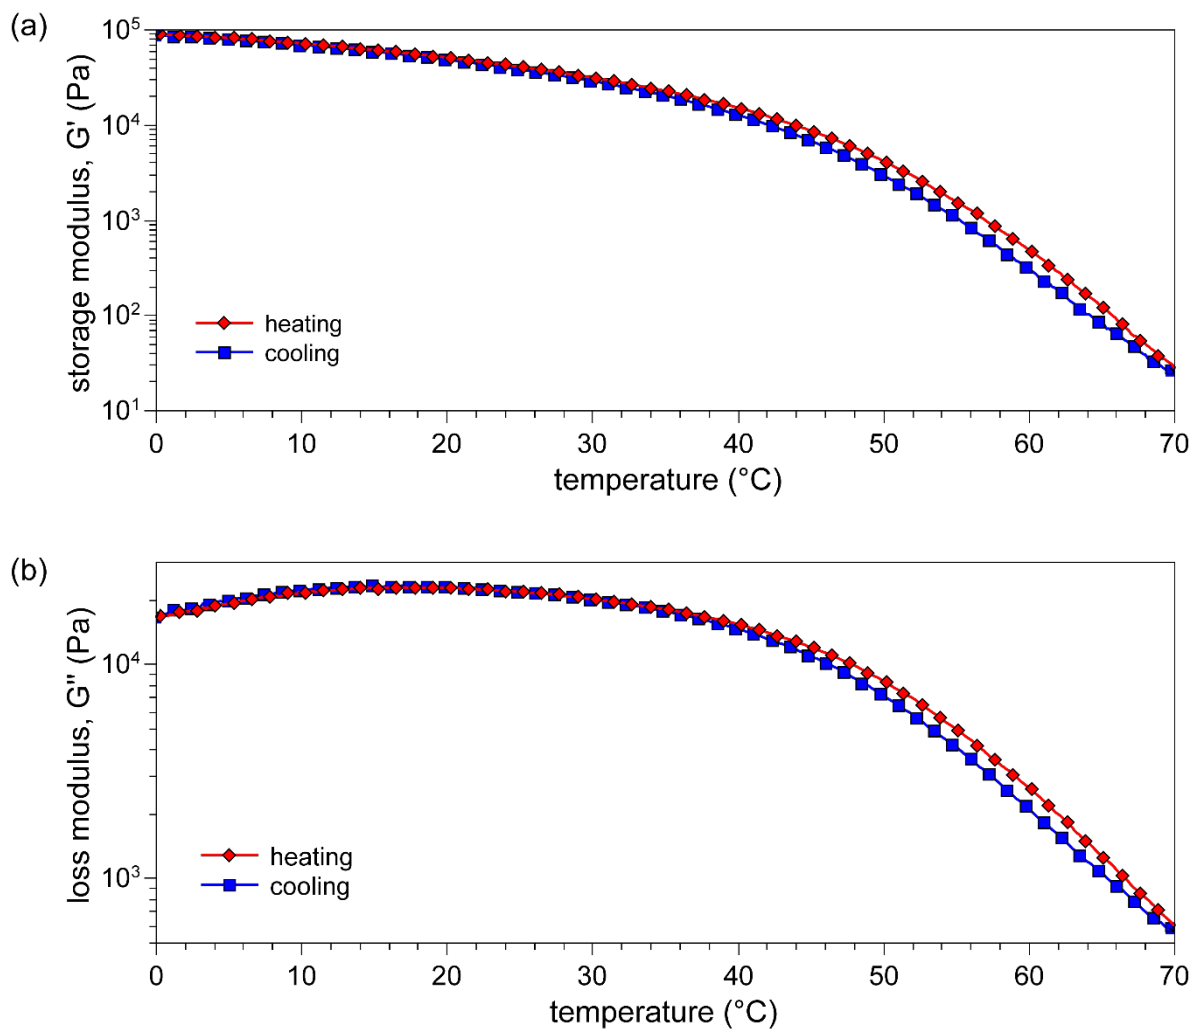

**Figure S8.** Temperature ramps (1  $^{\circ}\text{C}/\text{min}$ , 1 rad/s, 1%) of **PY-PSBTh** dry gel on cooling (blue) and heating (red).



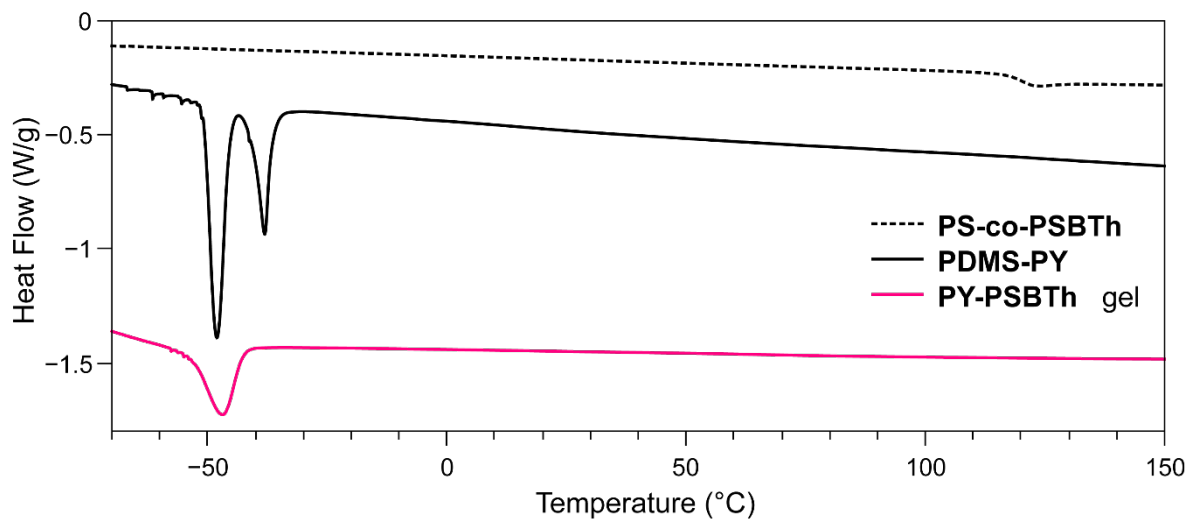

**Figure S9.** DSC thermograms of isolated **PS-co-PSBTh** (dotted black line), **PDMS-PY** (solid black line), and **PY-PSBTh** blend (solid pink line), ramp rate of 10 °C/min.

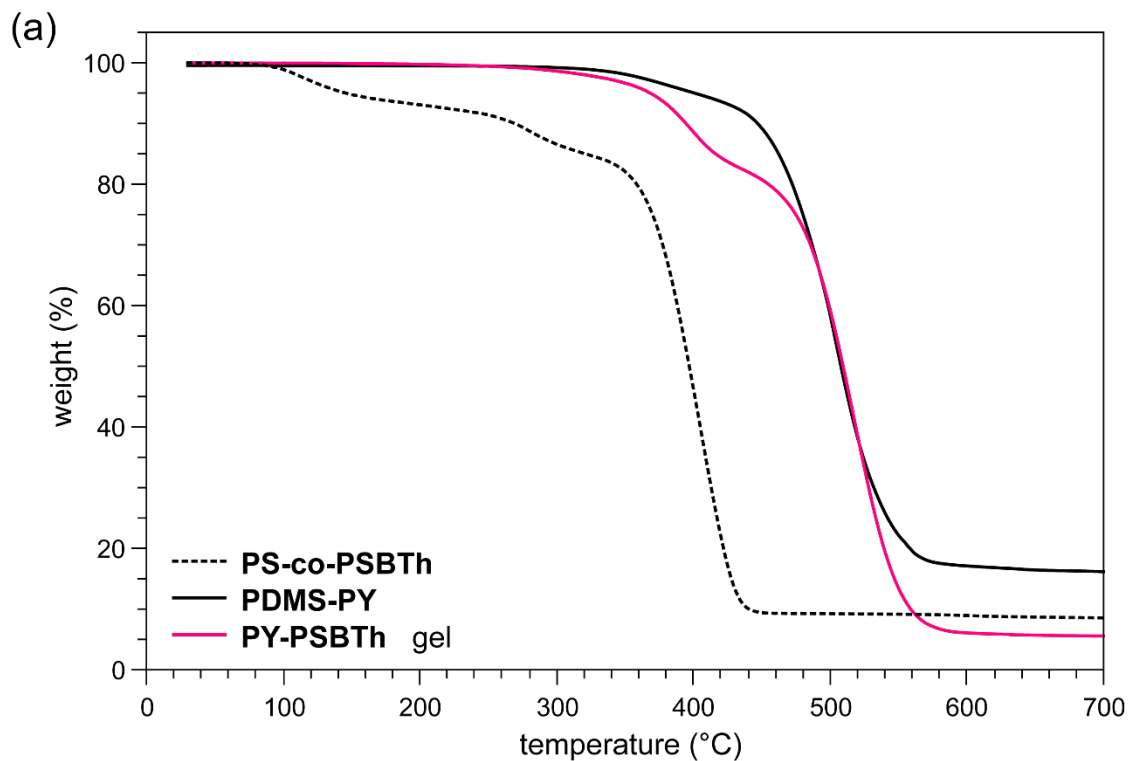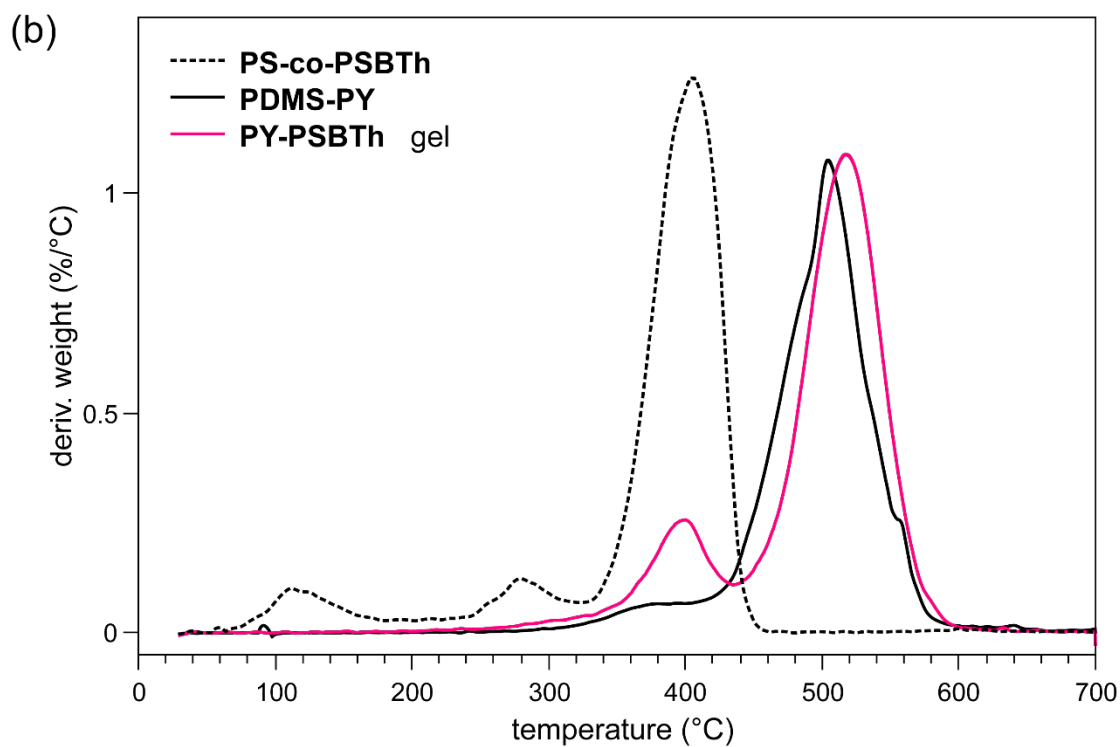

**Figure S10.** TGA traces of **PS-co-PSBTh** (dotted black line), **PDMS-PY** (solid black line), and **PY-PSBTh** blend (solid pink line), ramp rate of 10 °C/min: (a) weight (wt %) vs temperature (°C); (b) derivative (wt %/°C) vs temperature (°C).
